# Supplementary material for: Selection, identification and application of DNA aptamers for the detection of Bifidobacterium breve
Source: Royal Society of Chemistry journal article supplement (doi:10.1039/c6ra27672e), 2017-01-01
Supplement: c6ra27672e1.pdf [file c6ra27672e1.pdf]

1 **Supplemental data**

2 **Selection, identification and application of DNA aptamers for the detection of *Bifidobacterium***

3 *breve*

4

5 Lujun Hu,<sup>1</sup> Linlin Wang,<sup>1</sup> Wenwei Lu,<sup>1</sup> Qixiao Zhai,<sup>1</sup> Daming Fan,<sup>1</sup> Xiaoming Liu,<sup>1</sup> Jianxin

6 Zhao,<sup>1</sup> Hao Zhang<sup>1</sup> & Wei Chen<sup>1,2\*</sup>

7

8 <sup>1</sup> State Key Laboratory of Food Science and Technology, School of Food Science and Technology,

9 Jiangnan University, Wuxi 214122, PR China

10 <sup>2</sup> Beijing Innovation Centre of Food Nutrition and Human Health, Beijing Technology and Business

11 University, Beijing 100048, PR China

12

13

14

15

16

17 \* Corresponding author: Wei Chen

18 Tel./fax: +86 510 85912155

19 E-mail address: chenwei66@jiangnan.edu.cn

Table S1 Random sequence of six families of the 33 sequences (40nt)

| Family | Name  | Sequence (5'→3')                          |                                          |
|--------|-------|-------------------------------------------|------------------------------------------|
| I      | BB16p | CTCCCAGGCCGTTGGGGCGTTGCCTGCGTGCACCCGGGGC  |                                          |
|        | BB17p | CTCCCAGGCCGTTGGGGCGTTGCCTGCGTGCACCCGGGGC  |                                          |
|        | BB19p | CTCCCAGGCCGTTGGGGCGTTGCCTGCGTGCACCCGGGGC  |                                          |
|        | BB21p | CTCCCAGGCCGTTGGGGCGTTGCCTGCGTGCACCCGGGGC  |                                          |
|        | BB24p | CTCCCAGGCCGTTGGGGCGTTGCCTGCGTGCACCCGGGGC  |                                          |
|        | BB26p | CTCCCAGGCCGTTGGGGCGTTGCCTGCGTGCACCCGGGGC  |                                          |
|        | BB29p | CTCCCAGGCCGTTGGGGCGTTGCCTGCGTGCACCCGGGGC  |                                          |
|        | BB14p | CTCCCGGGCCGTGGGGCGTTGCCTGCGTGGACCCGGGGG   |                                          |
|        | BB18p | CCGCCTGCGAGGTAGTCGCCTCCCAGGTGTGTTTCAGGGGG |                                          |
|        | BB3p  | CCGGGTCCGTTAGTATGCCTTCCACTATGTCTCCCTGGG   |                                          |
|        | BB15p | CCGACTCAACGAGTTTCCTTATACCTCCAGCGTTGCCGGG  |                                          |
|        | II    | BB10p                                     | GGCCCCCTGCCTGCCAAAAAGGTGTTGCCAGGTTGGCGGC |
|        |       | BB11p                                     | GGCCCCCTGCCTGCCAAAAAGGTGTTGCCAGGTTGGCGGC |
|        |       | BB13p                                     | GGCCCCCTGCCTGCCAAAAAGGTGTTGCCAGGTTGGCGGC |
| BB23p  |       | TGCCCATCACCAAGAAAAAGAGCGTACCACGTGGTCTGGG  |                                          |
| BB25p  |       | GCGGCCTGCCTGGTTGGAACAGCCTGCCAAGCTTAGCCGG  |                                          |
| III    | BB2p  | CCGGGCAGCGGTCAATGCCGCACCTTCCATATGATCGGGG  |                                          |
|        | BB30p | CCGGGCAGCGGTCAATGCCGCACCTTCCATATGATCGGGG  |                                          |
|        | BB6p  | CGGATGCAGGGCCCGAGAGTGCCTCCCTTATGGATGTGAC  |                                          |
|        | BB8p  | CCGCTGCCGGGTCCGGTGACCTTCCAGTGTGCCGTCGTGTC |                                          |
|        | BB28p | TGCCTGCCAAGTTGCCGGCCTGCCAGGTACACCGACCTGC  |                                          |
|        | BB7p  | GCCTGCCAGGTATCGAGGCCTGCCAGGGTGTACTTGGTC   |                                          |
|        | BB31p | CGCCTACAAGGTCGTGCCTTCTAGGTAATATCTCATGGGC  |                                          |
|        | BB27p | GCCGGCCTCGATCCCAGGTCCCAGACCTGCGTTTGGGGGG  |                                          |
| IV     | BB20p | CCGGGTTCGCAACCTCCCTTATGCCTGGTGATGCCGGGGTA |                                          |
|        | BB33p | GCACATCGCCAGGGACCTAAGGCCTGCCGTTGCGCCTCGG  |                                          |
|        | BB12p | CCTCCCAAGACCACCCTGCAGGGCTTCTGCTCTACTGCGG  |                                          |
| V      | BB9p  | GCCAGATGCAAGGTGCATACCTTCCCTTATGCTGTGTCGGG |                                          |
|        | BB32p | CCGACTGCCAAGCTCAGAGCCTGCCTAGGGGTGCACAGGA  |                                          |
|        | BB5p  | TCGCATGCAGGGTGCTCGGACCTCCCTTGTGACTCACGGC  |                                          |
|        | BB4p  | GCGACAGCTGGTTCATTTACCTGATTCCCCTTATGTTTCGG |                                          |
| VI     | BB1p  | TCCGCGGCCTTCTAGCGTTAACTTGCAGGGTATGCGTGA   |                                          |
|        | BB22p | GCCGTGATTGGTGATGCGTCACCTTGAGCGTTGCCTTGGG  |                                          |
